# Supplementary material
Source: PubMed Central journal article supplement (PMC2571029)
Supplement: 0802727105_0802727105SI.pdf [file 0802727105_0802727105SI.pdf]

# Supporting Information

Niimi *et al.* 10.1073/pnas.0802727105

## Materials and Methods

Unless otherwise stated, all experiments were carried out with the SV40-transformed human fibroblast line MRC5V1, grown in Eagle's MEM with 10% or 15% FCS. For exposure to chemical mutagens, cells were plated at  $5 \times 10^5$  cells per 6-cm dish and treated 24 h later in medium containing the mutagen for the indicated times. The medium was then removed, and the cells washed twice in PBS and incubated in fresh medium.

**Generation of Stable Cell Lines Expressing Normal Levels of Proliferating Cell Nuclear Antigen (PCNA).** MRC5V1 cells were transfected with DNA encoding wild-type PCNA or PCNA-K164R tagged with 6 histidine residues in pcDNA3.1. The cDNA constructs carried in addition the following silent mutations to render them refractory to targeting by the siRNA: wild type, GC CGA GAT CTC AGC CAT AT; mutant, GC AGG GAC TTA TCT CAT AT. G418-resistant clones were picked, expanded, and analyzed by immunoblotting for the level of expressed His-PCNA. Clones expressing His-PCNA at close to endogenous PCNA levels were selected for further analysis. One wild-type and one PCNA-K164R clone were used in subsequent studies.

**siRNA Treatment.** MRC5V1 cells were transfected with 20 nM ATR siRNA (Dharmacon SMARTpool) or with 5–10 nM RPA-siRNA (AACACUCUAUCCUCUUUCAUG) by using Hiperfect transfection reagent (Qiagen). Cells were UV-irradiated 72 h later. Cell lines expressing exogenous PCNA were treated with PCNA siRNA [GCCGAGAUCUCAGC-CAUAUTT (Dharmacon)],  $\text{pol}\eta$  siRNA (SMARTpool ON-TARGETplus), or both, in 24-well plates, and depletion of endogenous PCNA was analyzed 72 h later. For controls, the nontargeting siRNA pool (Dharmacon) was used.

**Survival Experiments.** Cells expressing His-PCNA (wild type or K164R) were treated with siRNA for 72 h. They were then trypsin-treated and plated for a further 12 h before UV-irradiation or treatment with MMS or camptothecin for 1 h. Fresh medium was added, and colonies were counted after 10 days.

**Photoreactivation.** Fifty percent confluent cells on 6-cm cell culture dishes were washed with PBS and UV-irradiated ( $20 \text{ J m}^{-2}$ ). Either immediately or after 6 h in growth medium, cells were washed with PBS, and 4 ml of Hanks' buffer without phenol red was added to the dishes. The cells were exposed from below at room temperature to photoreactivating light from two fluorescent tubes for 2 h. The dishes were placed on a Perspex sheet to prevent overheating. After photoreactivation, the cells were incubated further in growth medium.

**Measurement of UV Photoproducts.** Genomic DNA was extracted from UV-irradiated XP-A cells expressing photolyases (1) with or without photoreactivation treatment. Cyclobutane pyrimidine dimers (CPDs) and pyrimidine(6-4)pyrimidone photoproducts (6-4PPs) were measured by using a protocol described in ref. 2. Briefly, 5  $\mu\text{l}$  containing 100 or 400 ng of DNA were spotted onto Hybond N<sup>+</sup> filters. The filters were incubated with either TDM-2 anti-CPD or 64M-2 anti-6-4PP antibody (3) for 1 h.

**Flow Cytometry.** Cells were harvested, washed twice in PBS, and fixed in ethanol. Fixed cells were washed in PBS-Tween, incubated with 0.5 mg/ml RNase A and 0.05 mg/ml propidium iodide for 1 h, and analyzed in a Becton-Dickinson FACSaria flow cytometer.

**Western Blotting.** Plates were washed twice in PBS and 150  $\mu\text{l}$  of lysis buffer [50 mM Tris-HCl (pH 7.5), 150 mM NaCl, 0.1% SDS] added directly to the plates. Cells were harvested by scraping, incubated on ice for 10 min, and then sonicated to shear the DNA. Fifteen microliters was loaded onto 8% SDS/polyacrylamide gels. After electrophoresis, proteins were transferred to PVDF membranes and immunoblotted with antibodies to PCNA (PC10, 1:5,000; Santa Cruz Biotechnology), USP1 (1:3,000; supplied by Tony Huang, New York University, New York), ATR (1:500; Santa Cruz Biotechnology), RPA (1:1,000; Oncogene), Chk1 phosphorylated on S317 (1:1,000; Cell Signaling), or vimentin (1:5,000; Oncogene). Triton X-100 extraction of cells on the dishes was carried out as described in ref. 4.

1. Nakajima S, *et al.* (2004) UV light-induced DNA damage and tolerance for the survival of nucleotide excision repair-deficient human cells. *J Biol Chem* 279:46674–46677.
2. You YH, *et al.* (2001) Cyclobutane pyrimidine dimers are responsible for the vast majority of mutations induced by UVB irradiation in mammalian cells. *J Biol Chem* 276:44688–44694.
3. Mori T, *et al.* (1991) Simultaneous establishment of monoclonal antibodies specific for either cyclobutane pyrimidine dimer or (6'-4') photoproduct from the same mouse immunized with ultraviolet-irradiated DNA. *Photochem Photobiol* 54:225–232.

4. Kannouche PL, Wing J, Lehmann AR (2004) Interaction of human DNA polymerase  $\eta$  with monoubiquitinated PCNA: A possible mechanism for the polymerase switch in response to DNA damage. *Mol Cell* 14:491–500.

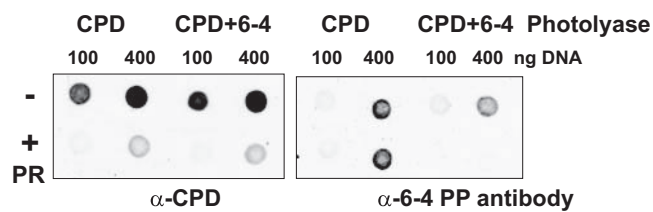

**Fig. S1.** Photoreactivation of UV lesions. XP-A cells expressing either CPD (*Left*) or both CPD and 6-4PP photolyase (*Right*) were irradiated with 0 or 20 J m<sup>-2</sup> UV. Cells were immediately either sham-exposed (-) or exposed to visible light for 1.5 h (+PR). Photoproducts in the genome were measured with anti-CPD or anti-6-4PP antibody.

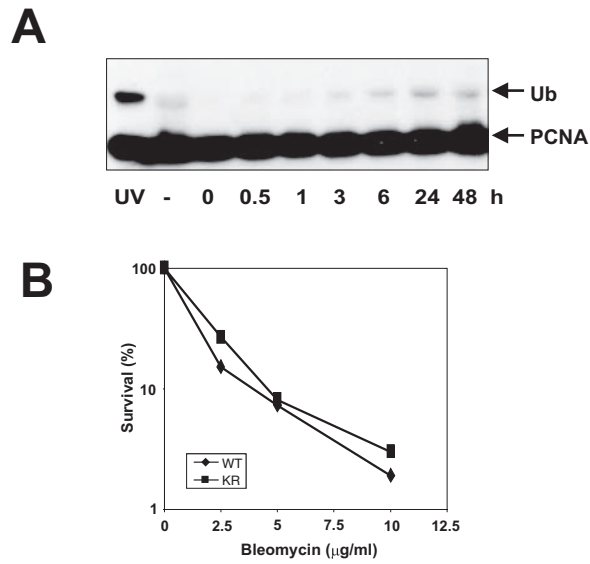

**Fig. S2.** Effect of bleomycin. (A) Cells were treated with 100 μg/ml bleomycin for 1 h and incubated for the indicated times. UV indicates cells exposed to UV (20 J m<sup>-2</sup>) and incubated for 6 h, as a positive control. (B) Bleomycin survival curves of cells depleted for endogenous PCNA and expressing wild-type (WT) or mutant (KR) His-PCNA.

**Table S1. Percentage of cells in different phases of the cell cycle with or without RPA knockdown (KD)**

| RPA status          | G <sub>1</sub> , % | S, % | G <sub>2</sub> , % |
|---------------------|--------------------|------|--------------------|
| No UV control       | 67                 | 19   | 14                 |
| No UV RPA knockdown | 58                 | 21   | 20                 |
| UV control          | 71                 | 15.5 | 13                 |
| UV RPA knockdown    | 67                 | 17   | 15                 |
